# Supplementary material
Source: PubMed Central journal article supplement (PMC3838567)

SUPPLEMENTARY DATA

**Table S1** Main characteristics of the source populations and their sites, especially soil conditions

|                          |                | Site               |              | Distance to closest population |                     | Population                     |                             |                              | Soil conditions <sup>4</sup> |                       |           |           |         |                  |                 |                   |                   |                   |                 |
|--------------------------|----------------|--------------------|--------------|--------------------------------|---------------------|--------------------------------|-----------------------------|------------------------------|------------------------------|-----------------------|-----------|-----------|---------|------------------|-----------------|-------------------|-------------------|-------------------|-----------------|
|                          |                | Latitude/Longitude | Altitude (m) | Overall (km)                   | Within habitat (km) | Plant height <sup>1</sup> (cm) | Seed mass <sup>2</sup> (mg) | Germination <sup>3</sup> (%) | pH <sub>H<sub>2</sub>O</sub> | Moisture <sup>5</sup> | N (%)     | C (%)     | C/N     | Ammonium (mg/kg) | Nitrate (mg/kg) | Phosphate (mg/kg) | Potassium (mg/kg) | Magnesium (mg/kg) | Calcium (mg/kg) |
| <b>Deciduous forest</b>  | 1              | 48.423/11.878      | 425          | 2.3                            | 2.5                 | 185                            | 13                          | 72                           | 7.5                          | 15.7                  | 0.4       | 7.7       | 28      | 38.8             | 366             | 20                | 59.7              | 47.1              | 888             |
|                          | 2              | 48.402/11.760      | 493          | 2.1                            | 2.2                 | 125                            | 14                          | 72                           | 7.5                          | 12.6                  | 0.3       | 7.3       | 38      | 23.6             | 112             | 29                | 63.4              | 38.9              | 722             |
|                          | 3              | 48.403/11.791      | 493          | 2.3                            | 2.3                 | 148                            | 14                          | 92                           | 6.5                          | 12.6                  | 0.2       | 4.1       | 32      | *                | 129             | 19                | 37.8              | 24.4              | 137             |
|                          | 4              | 48.385/11.744      | 493          | 2.2                            | 2.2                 | 96                             | 13                          | 57                           | 7.6                          | 10.6                  | 0.2       | 6.9       | 72      | 29.9             | 84              | 19                | 62.0              | 25.0              | 616             |
|                          | 5 <sup>6</sup> | 48.413/11.848      | 426          | 0.9                            | 2.5                 | n.a.                           | 15                          | 73                           | n.a.                         | n.a.                  | n.a.      | n.a.      | n.a.    | n.a.             | n.a.            | n.a.              | n.a.              | n.a.              | n.a.            |
| <i>Mean ± s.d.</i>       |                |                    | 466 ± 33     | 1.9 ± 0.5                      | 2.3 ± 0.2           | 138 ± 32                       | 14 ± 1                      | 73 ± 11                      | 7.3 ± 0.4                    | 12.9 ± 1.8            | 0.2 ± 0.1 | 6.5 ± 1.4 | 42 ± 18 | 30.8 ± 6.2       | 172 ± 133       | 22 ± 4            | 55.7 ± 10.5       | 33.8 ± 9.6        | 591 ± 280       |
| <b>Fallow meadow</b>     | 1              | 48.440/11.625      | 366          | 2.6                            | 2.6                 | n.a.                           | 14                          | 94                           | 6.8                          | 11.3                  | 0.6       | 6.3       | 14      | 48.9             | 558             | 148               | 549.0             | 67.2              | 693             |
|                          | 2              | 48.443/11.660      | 438          | 2.6                            | 2.6                 | 193                            | 13                          | 86                           | 7.3                          | 19.7                  | 0.3       | 2.8       | 12      | 0.0              | 134             | 14                | 7.1               | 31.9              | 77              |
|                          | 3              | 48.451/11.706      | 429          | 2.5                            | 3.5                 | 146                            | 13                          | 97                           | 6.4                          | 30.2                  | 0.3       | 3.7       | 17      | 28.5             | 288             | 23                | 102.0             | 39.6              | 576             |
|                          | 4              | 48.403/11.711      | 452          | 0.9                            | 0.9 <sup>7</sup>    | 180                            | 11                          | 96                           | 7.2                          | 18.5                  | 0.2       | 2.1       | 12      | 10.2             | 241             | 76                | 131.9             | 27.7              | 256             |
|                          | 5              | 48.395/11.713      | 461          | 0.9                            | 0.9 <sup>7</sup>    | 128                            | 13                          | 93                           | 6.7                          | 25.4                  | 0.4       | 3.7       | 10      | 7.6              | 301             | 22                | 21.2              | 44.3              | 376             |
| <i>Mean ± s.d.</i>       |                |                    | 429 ± 33     | 1.9 ± 0.8                      | 2.1 ± 1.1           | 162 ± 26                       | 13 ± 1                      | 93 ± 4                       | 6.9 ± 0.3                    | 21.0 ± 6.4            | 0.4 ± 0.1 | 3.7 ± 1.5 | 13 ± 2  | 19.0 ± 17.6      | 305 ± 140       | 57 ± 51           | 162.2 ± 199.0     | 42.1 ± 13.8       | 396 ± 220       |
| <b>Coniferous forest</b> | 1              | 48.429/11.700      | 477          | 2.5                            | 2.5                 | 156                            | 11                          | 84                           | 6.9                          | 10.2                  | 0.5       | 7.6       | 22      | 38.8             | 391             | 27                | 57.7              | 70.9              | 1127            |
|                          | 2              | 48.411/11.679      | 469          | 2.5                            | 2.5                 | 155                            | 12                          | 83                           | 4.2                          | 32.2                  | 0.3       | 5.6       | 17      | 32.1             | n.a.            | n.a.              | 63.9              | 37.1              | 79              |
|                          | 3              | 48.414/11.640      | 504          | 2.9                            | 2.9                 | 91                             | 11                          | 77                           | 4.1                          | 4.5                   | 0.8       | 13.8      | 20      | 65.4             | 200             | 93                | 128.7             | 26.0              | 243             |
|                          | 4              | 48.421/11.847      | 479          | 0.9                            | 6.6                 | 149                            | 14                          | 93                           | 4.7                          | 6.2                   | 0.5       | 6.4       | 16      | 35.0             | 83              | 21                | 105.1             | 22.6              | 176             |
|                          | 5              | 48.420/11.758      | 489          | 2.1                            | 4.4                 | 139                            | 11                          | 58                           | 5.7                          | 14.8                  | 0.3       | 4.9       | 18      | 20.1             | 85              | *                 | 35.1              | 32.6              | 254             |
| <i>Mean ± s.d.</i>       |                |                    | 484 ± 12     | 2.2 ± 0.7                      | 3.8 ± 1.6           | 138 ± 24                       | 12 ± 1                      | 79 ± 12                      | 5.1 ± 1.1                    | 13.6 ± 10.0           | 0.5 ± 0.2 | 7.7 ± 3.2 | 19 ± 2  | 38.3 ± 14.9      | 190 ± 125       | 47 ± 32           | 78.1 ± 33.9       | 37.8 ± 17.3       | 376 ± 381       |

n.a. = not available

<sup>1</sup> *Impatiens glandulifera*, mean plant height of four measurements per population at full development (August 2012)

<sup>2</sup> Weighted as  $n = 5 \times 500$  seeds per population

<sup>3</sup>  $N = 5 \times 50$  stratified seeds germinated on wet filter paper in Petri dishes at 5/15 °C, 12:12 h, without light, for 3 weeks

<sup>4</sup> Mixed soil sample from five cores, diameter 1.5 cm, 0–14 cm depth (for all soil characteristics but moisture)

<sup>5</sup> Mean of five measurements per population in August 2012

<sup>6</sup> Site became disturbed after seed collection in autumn 2011

<sup>7</sup> Distance between fallow meadows 4 and 5 below 2 km was considered not to cause problems because sites are separated by a ridge and belong to different watersheds.

\* Below detection limit

**Table S2** Main characteristics of the plot sites in the reciprocal transplant experiment and their soil conditions

|                          |   | Site                   |                                   |                 |                         | Soil conditions <sup>2</sup> |                       |           |           |         |                     |                    |                      |                      |                      |                    |
|--------------------------|---|------------------------|-----------------------------------|-----------------|-------------------------|------------------------------|-----------------------|-----------|-----------|---------|---------------------|--------------------|----------------------|----------------------|----------------------|--------------------|
|                          |   | Latitude/<br>Longitude | Distance<br>to source<br>pop. (m) | Altitude<br>(m) | PAR <sup>1</sup><br>(%) | pH <sub>H<sub>2</sub>O</sub> | Moisture <sup>3</sup> | N (%)     | C (%)     | C/N     | Ammonium<br>(mg/kg) | Nitrate<br>(mg/kg) | Phosphate<br>(mg/kg) | Potassium<br>(mg/kg) | Magnesium<br>(mg/kg) | Calcium<br>(mg/kg) |
| <b>Deciduous forest</b>  | 1 | 48.423/11.878          | 48                                | 432             | 0.8                     | 7.5                          | 22.6                  | 0.4       | 8.4       | 31      | 32.3                | 407                | *                    | 76.3                 | 50.3                 | 915                |
|                          | 2 | 48.404/11.762          | 314                               | 448             | 2.7                     | 7.5                          | 11.7                  | 0.3       | 7.9       | 41      | 27.9                | 161                | 15                   | 88.3                 | 42.4                 | 784                |
|                          | 3 | 48.403/11.791          | 35                                | 445             | 5.9                     | 7.5                          | 20.0                  | 0.3       | 8.5       | 36      | 2.3                 | 194                | 27                   | 42.1                 | 15.5                 | 128                |
|                          | 4 | 48.385/11.744          | 36                                | 460             | 2.2                     | 7.6                          | 9.3                   | 0.1       | 6.8       | 142     | 20.1                | 50                 | *                    | 53.6                 | 24.1                 | 621                |
|                          | 5 | 48.410/11.836          | 962                               | 437             | 0.9                     | 7.6                          | 16.2                  | 0.3       | 8.3       | 36      | 32.5                | 406                | 19                   | 87.9                 | 53.8                 | 834                |
| <i>Mean ± s.d.</i>       |   |                        | 279 ± 358                         | 444 ± 10        | 2.5 ± 1.9               | 7.5 ± 0.0                    | 16 ± 4.9              | 0.3 ± 0.1 | 8.0 ± 0.6 | 57 ± 43 | 23.0 ± 11.3         | 244 ± 141          | 20 ± 5               | 69.6 ± 18.7          | 37.2 ± 15.0          | 656 ± 281          |
| <b>Fallow meadow</b>     | 1 | 48.441/11.626          | 118                               | 438             | 88.0                    | 6.6                          | 12.4                  | 0.2       | 3.0       | 18      | 11.7                | 156                | 11                   | 20.5                 | 27.7                 | 616                |
|                          | 2 | 48.443/11.660          | 37                                | 450             | 3.2                     | 6.0                          | 10.7                  | 0.3       | 3.2       | 12      | 15.2                | 33                 | 16                   | 26.0                 | 18.1                 | 37                 |
|                          | 3 | 48.451/11.706          | 42                                | 439             | 42.5                    | 6.0                          | 17.4                  | 0.3       | 3.4       | 18      | 34.4                | 136                | 42                   | 65.6                 | 31.0                 | 789                |
|                          | 4 | 48.403/11.709          | 116                               | 465             | 47.1                    | 5.8                          | 24.2                  | 0.3       | 2.6       | 10      | 10.3                | 232                | 33                   | 28.4                 | 21.6                 | 235                |
|                          | 5 | 48.395/11.713          | 34                                | 450             | 85.5                    | 6.3                          | 37.9                  | 0.3       | 2.8       | 10      | 13.8                | 360                | 17                   | 23.3                 | 31.9                 | 293                |
| <i>Mean ± s.d.</i>       |   |                        | 69 ± 39                           | 448 ± 10        | 53.2 ± 31.3             | 6.1 ± 0.3                    | 20.5 ± 9.9            | 0.3 ± 0.0 | 3.0 ± 0.3 | 14 ± 4  | 17.1 ± 8.8          | 183 ± 107          | 24 ± 12              | 32.8 ± 16.6          | 26.1 ± 5.4           | 394 ± 271          |
| <b>Coniferous forest</b> | 1 | 48.431/11.689          | 792                               | 487             | 6.7                     | 4.0                          | 10.6                  | 0.4       | 7.1       | 20      | 44.1                | 55                 | 25                   | 65.3                 | 15.6                 | 86                 |
|                          | 2 | 48.408/11.679          | 407                               | 481             | 16.8                    | 4.1                          | 18.4                  | 0.4       | 7.5       | 19      | 15.0                | 53                 | 59                   | 24.9                 | 8.6                  | 20                 |
|                          | 3 | 48.414/11.641          | 119                               | 506             | 3.4                     | 4.0                          | 11.0                  | 0.3       | 7.1       | 24      | 42.9                | 76                 | *                    | 48.2                 | 13.5                 | 84                 |
|                          | 4 | 48.420/11.844          | 310                               | 492             | 11.5                    | 3.9                          | 6.9                   | 0.3       | 5.1       | 18      | 36.9                | 16                 | *                    | 61.4                 | 7.9                  | 54                 |
|                          | 5 | 48.418/11.760          | 269                               | 493             | 5.0                     | 3.8                          | 18.4                  | 0.2       | 4.0       | 18      | 30.9                | 69                 | *                    | 37.0                 | 14.5                 | 74                 |
| <i>Mean ± s.d.</i>       |   |                        | 379 ± 226                         | 492 ± 8         | 8.7 ± 4.9               | 4.0 ± 0.1                    | 13.1 ± 4.6            | 0.3 ± 0.1 | 6.2 ± 1.4 | 20 ± 2  | 33.9 ± 10.6         | 54 ± 21            | n.a.                 | 47.4 ± 15.0          | 12.0 ± 3.2           | 64 ± 25            |

n.a. = not available

<sup>1</sup> Photosynthetically active radiation above *Impatiens glandulifera* canopy in the control treatment, *n* = four measurements per plot (August 2012)

<sup>2</sup> Mixed soil sample from five cores, diameter 1.5 cm, 0–14 cm depth (for all soil characteristics but moisture)

<sup>3</sup> Mean of five measurements per population in August 2012

\* Below detection limit

**Fig. S1** Experimental design. The transplant experiment (A) included 15 plots (one is shown), five in each of three habitat types. In one half of each plot (0.8 m x 0.8 m) the soil remained untreated ('undisturbed soil'); in the other half all aboveground litter and vegetation were removed and the soil was disturbed with a rake ('disturbed soil'). Each half of the plot contained 16 subplots (0.2 m x 0.2 m). One remained as a control (C) and seeds of each source populations were sown into the other subplots (DF = deciduous alluvial forest; FM = fallow meadow; CF = coniferous upland forest). The greenhouse experiment (B) included five replicated rows of eight blocks (one row is shown). Half of each row was exposed to high shade (5% PAR), the other half to low shade (10% PAR). Each block contained one plant from each for the source populations, leading to 15 pots per block.

**A**

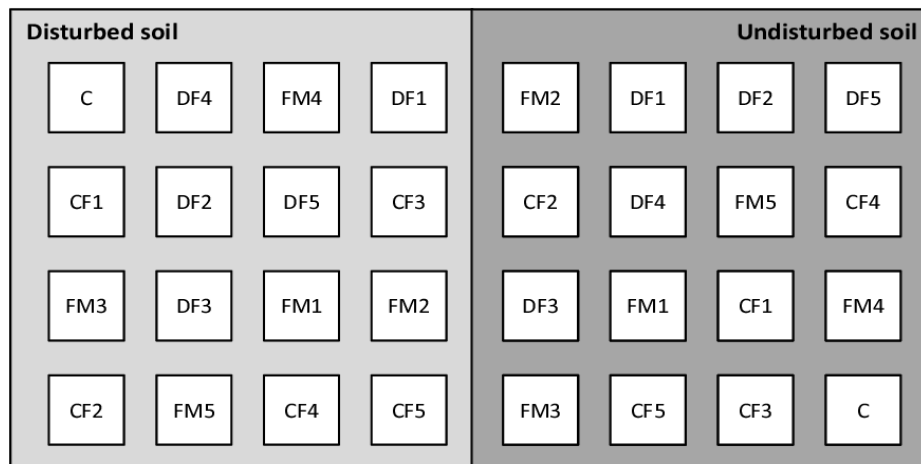

**B**

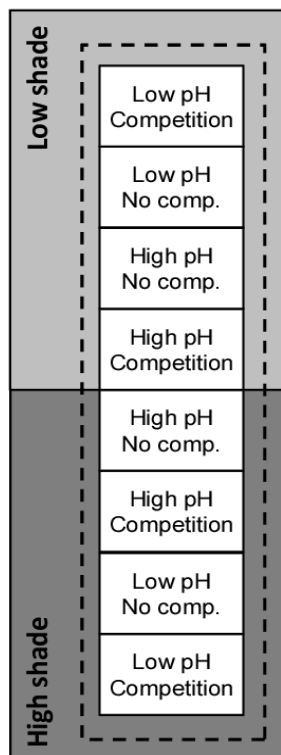

**Fig. S2** Plant height (A, B) and relative growth rate (C, D) of the invasive alien *Impatiens glandulifera* when reciprocally transplanted between deciduous forests (df/DF), fallow meadows (fm/FM) and coniferous upland forest (cf/CF) in the invaded range. Seed origins are indicated with capital letters, plot habitats with small letters. Soil remained either undisturbed (A, C) or was experimentally disturbed before planting (B, D). The number of plant individuals in each group is given in small italic numbers above the boxplots.

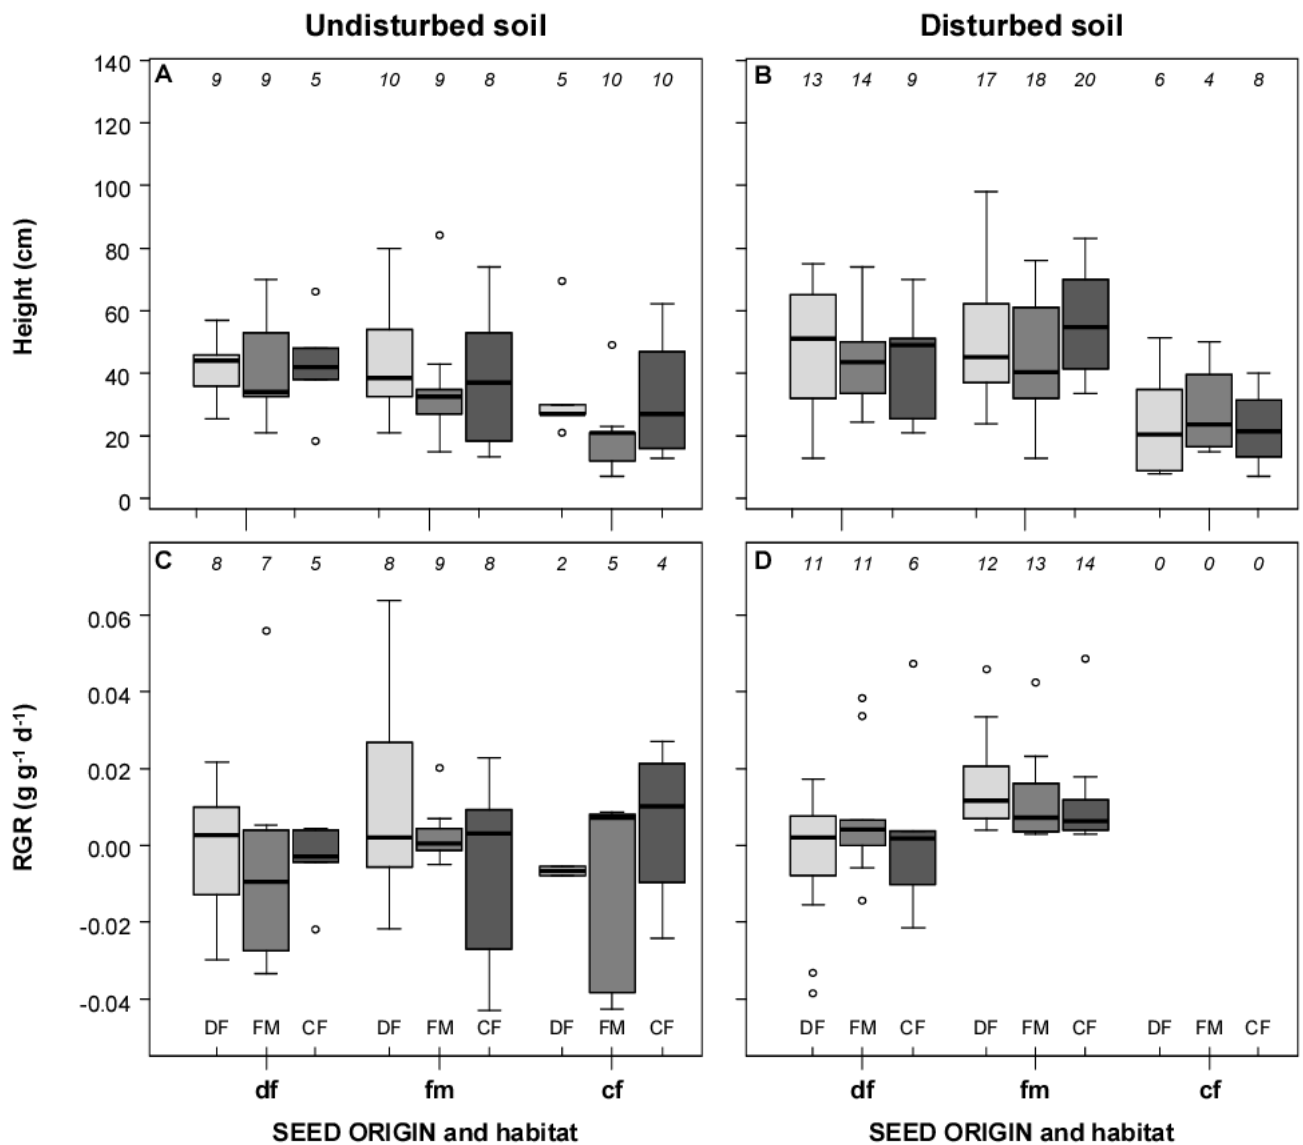

**Fig. S3** Plant height (A, B) and relative growth rate (C, D) of invasive populations of *Impatiens glandulifera* in a greenhouse experiment. Plants were exposed to eight treatments in a full-factorial design, including high and low shade, competition by a common grass species (*Arrhenatherum elatius*) and no competition, as well as low and high soil acidity. Plant material originated from three habitat types, i.e. alluvial deciduous forests (DF), fallow meadows (FM) and coniferous upland forests (CF). Most groups represent 15 replicates, except five cases where only 14 replicates were available.

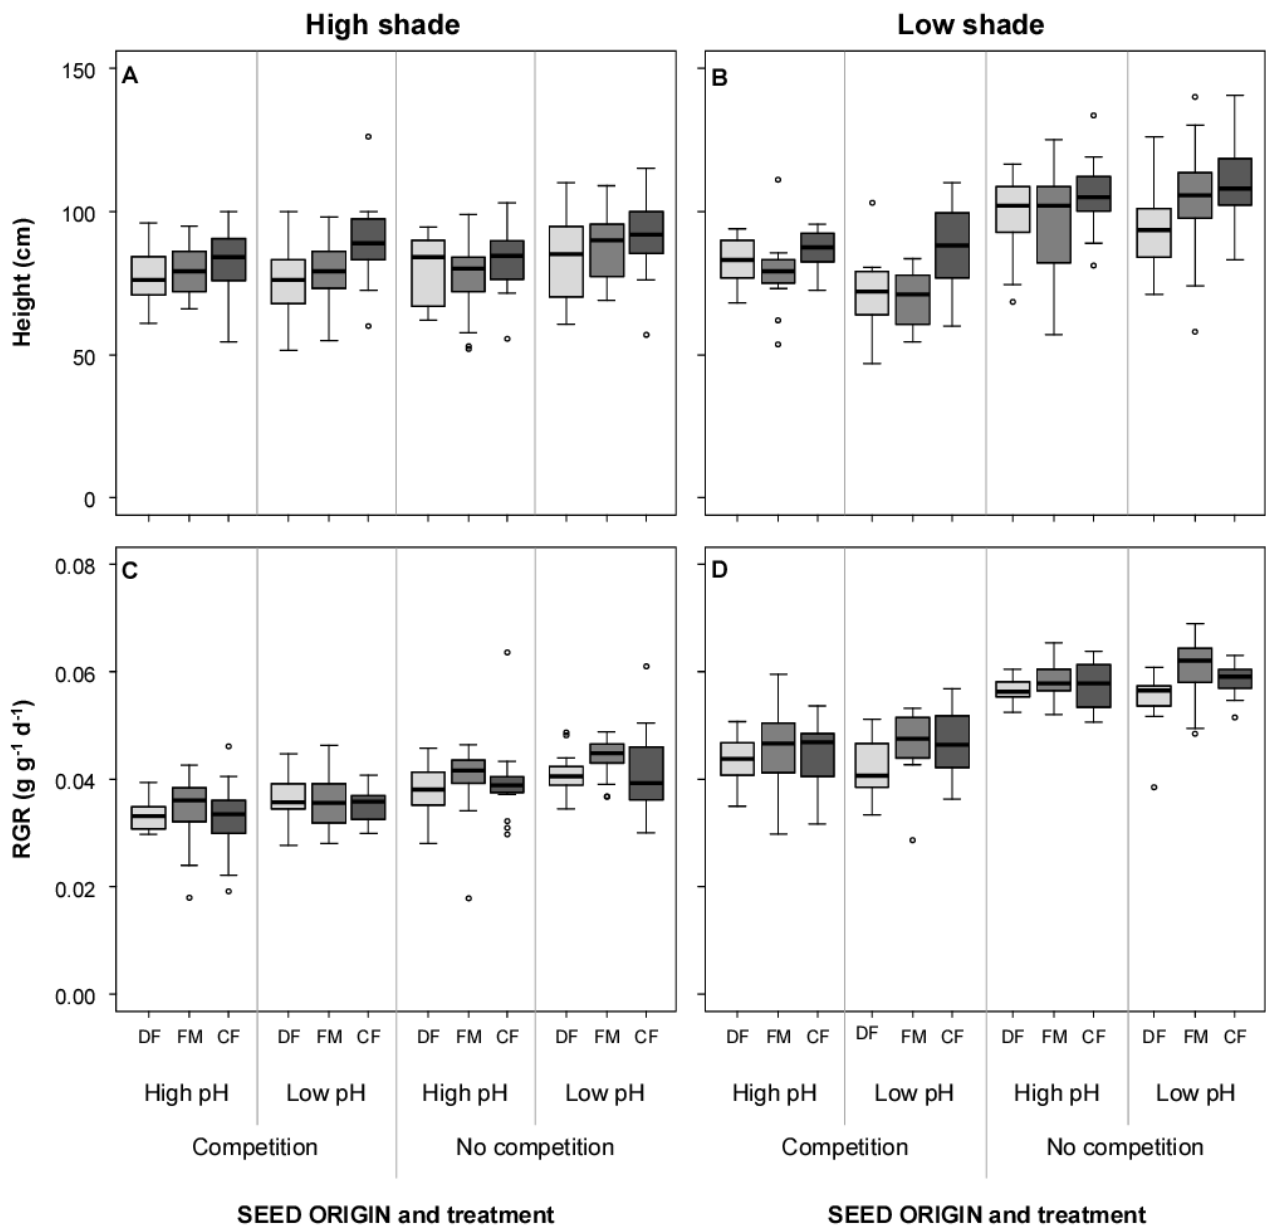

Supplement: supp_mct246_mct246supp.pdf [file supp_mct246_mct246supp.pdf]
